# Supplementary material for: Increased TIMP-3 expression alters the cellular secretome through dual inhibition of the metalloprotease ADAM10 and ligand-binding of the LRP-1 receptor
Source: PubMed Central journal article supplement (PMC6168507; doi:10.1038/s41598-018-32910-4), 2018-10-02
Supplement: 41598_2018_32910_MOESM1_ESM.pdf [file 41598_2018_32910_MOESM1_ESM.pdf]

# Increased TIMP-3 expression alters the cellular secretome through dual inhibition of the metalloprotease ADAM10 and ligand-binding of the LRP-1 receptor

Simone D. Scilabra, Martina Pighi, Veronica Pravata, Tobias Schatzl, Stephan A. Müller, Linda Troeberg, Stefan F. Lichtenthaler

Supplementary Information

# Figure 2

TIMP3

HEK

HEK/T3

HEK

HEK/T3

50

37

25

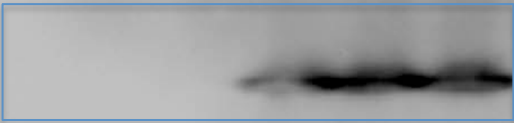

→ Figure 2

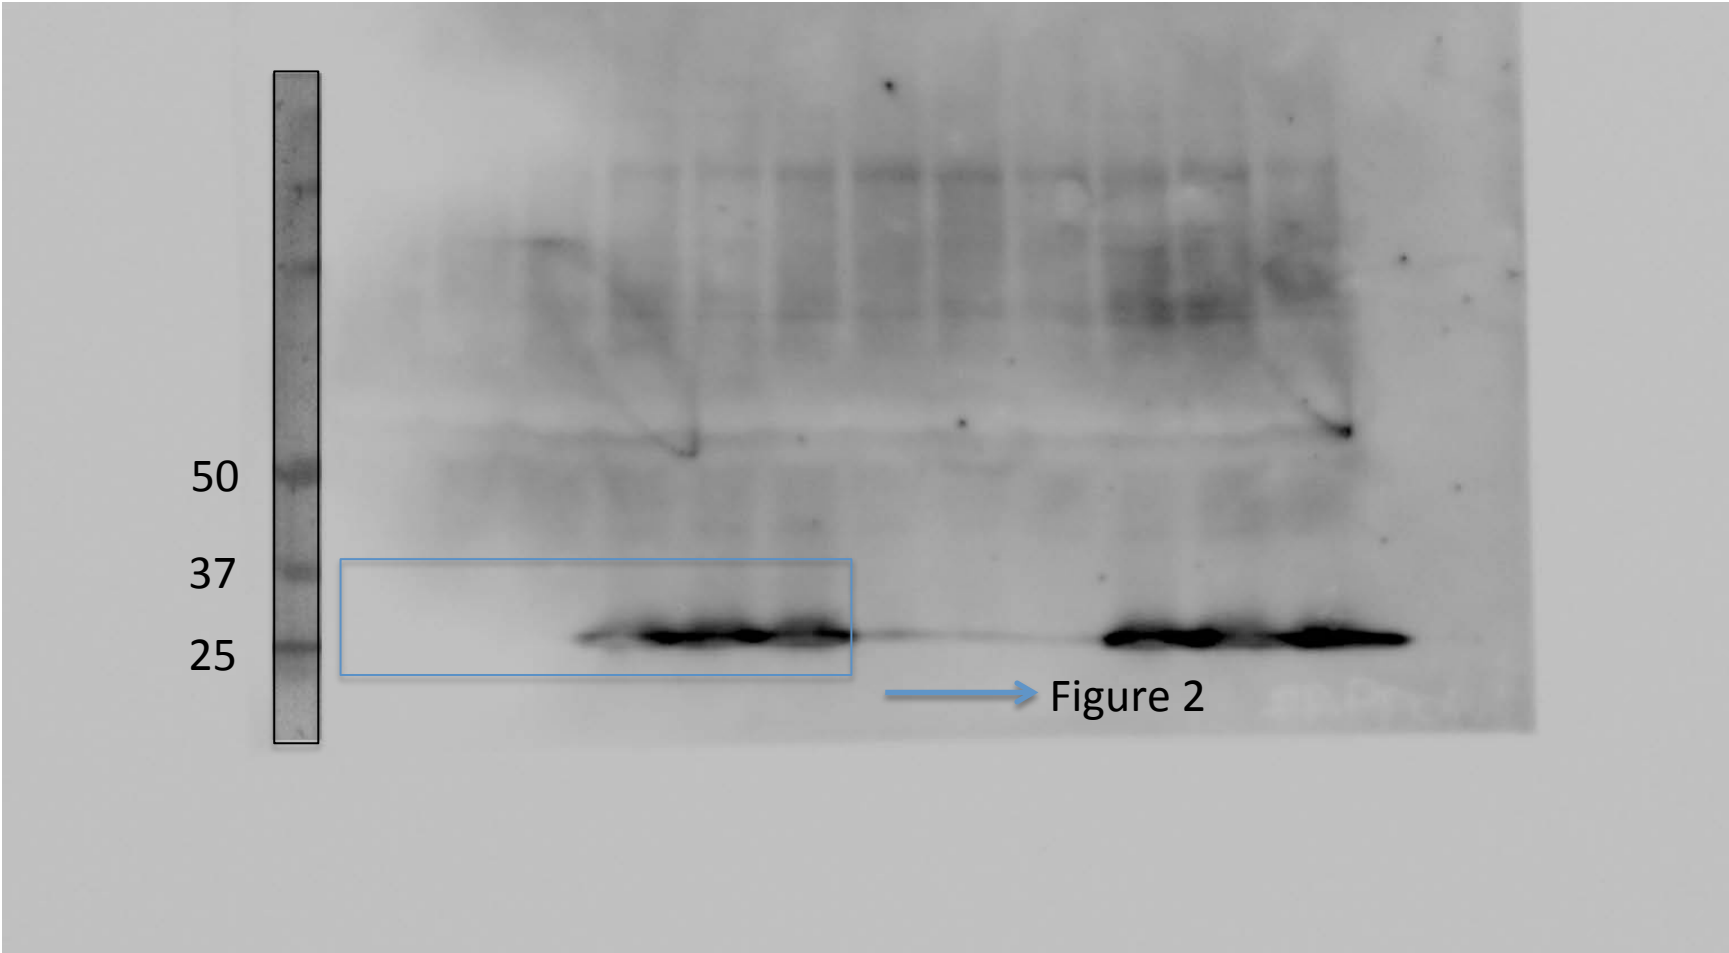

# sAPPalpha

HEK HEK/T3 HEK HEK/T3

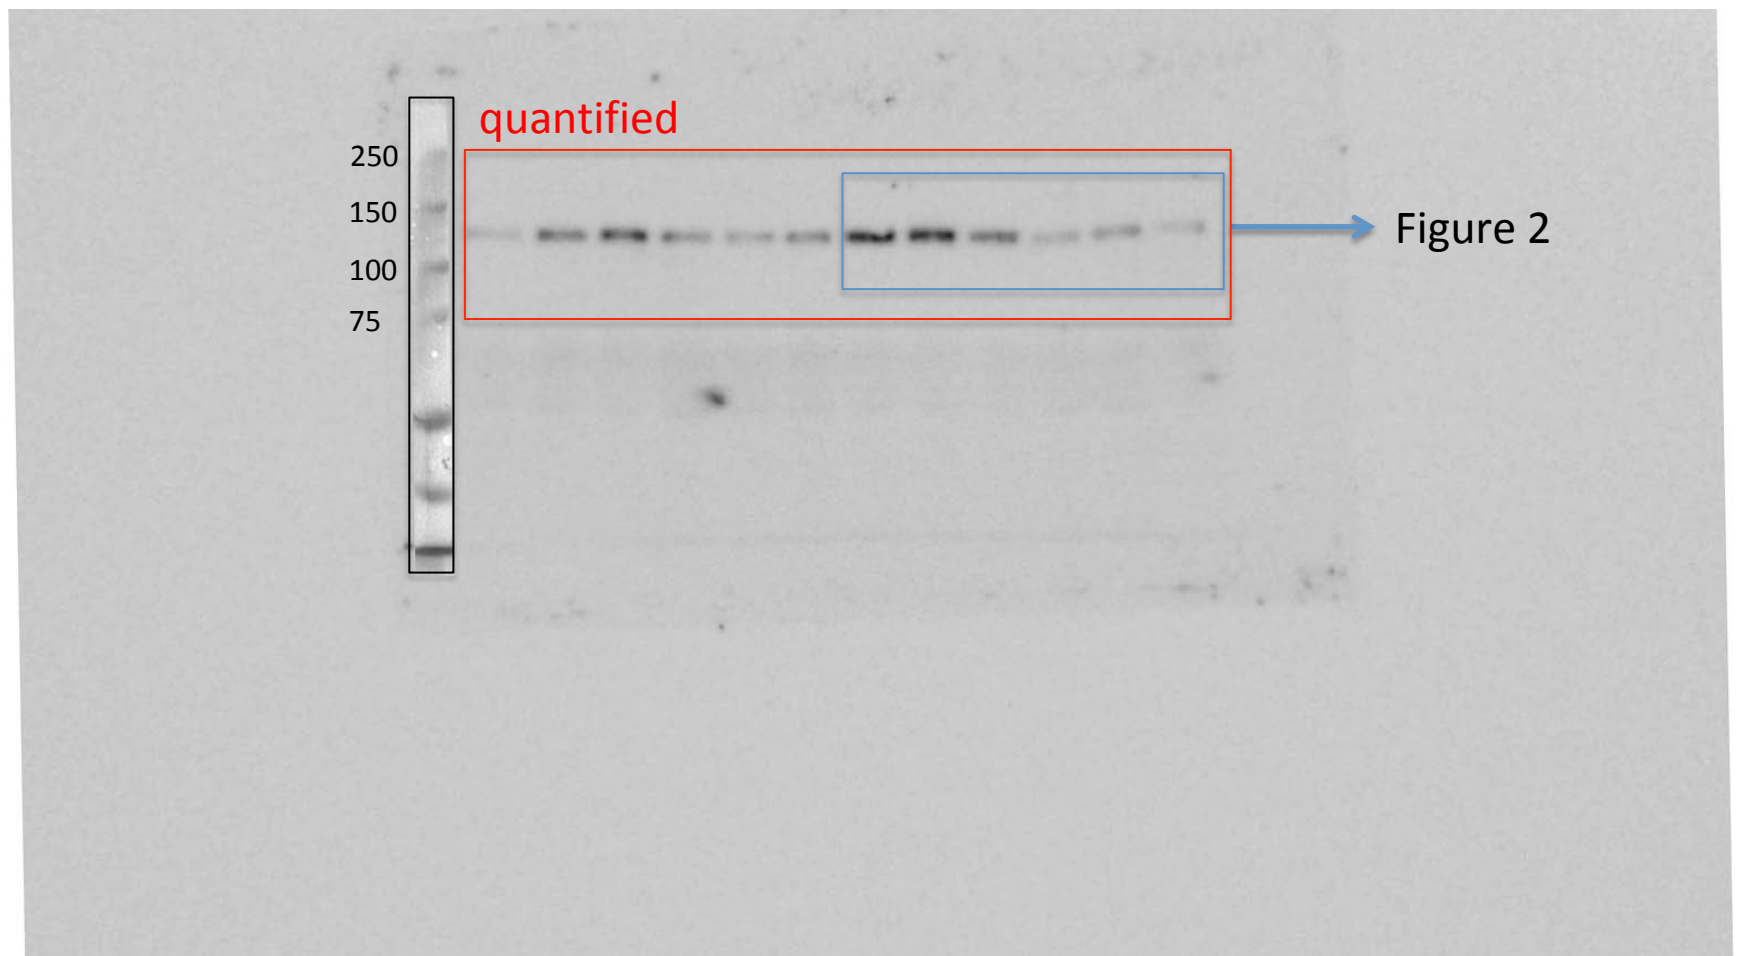

Blue square: bands in the MS. Red square: bands quantified for statistics

sAPP

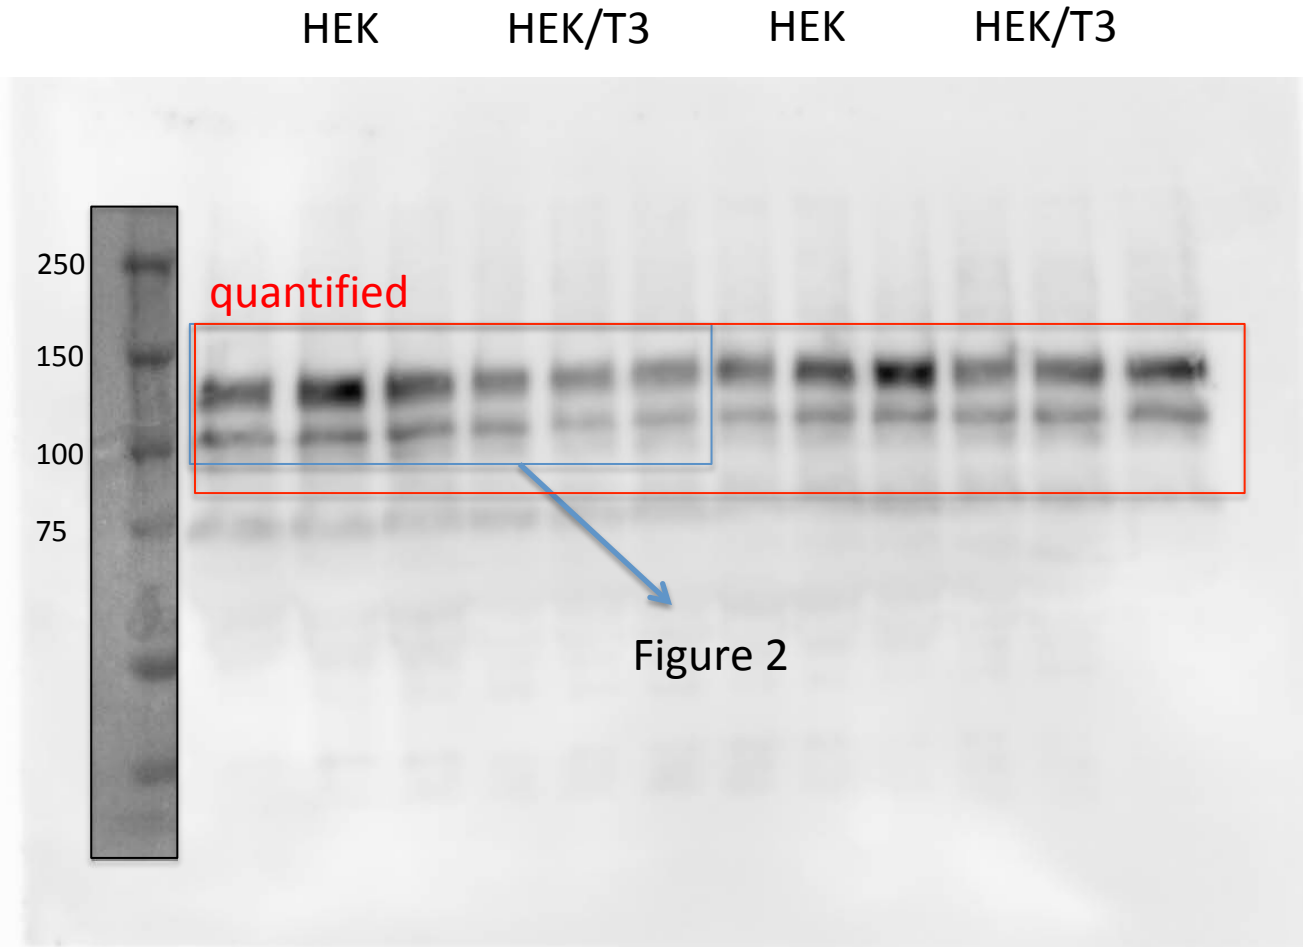

Blue square: bands in the MS. Red square: bands quantified for statistics

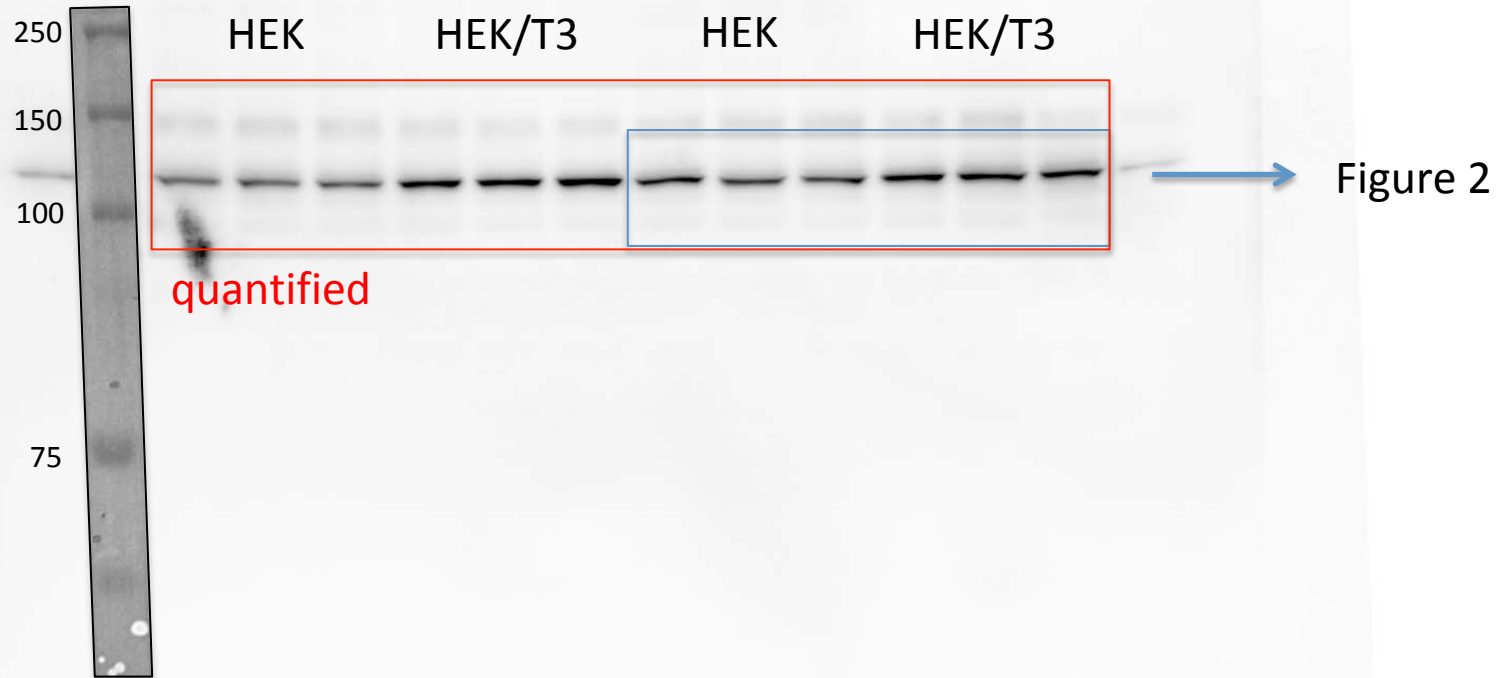

Blue square: bands in the MS. Red square: bands quantified for statistics

actin

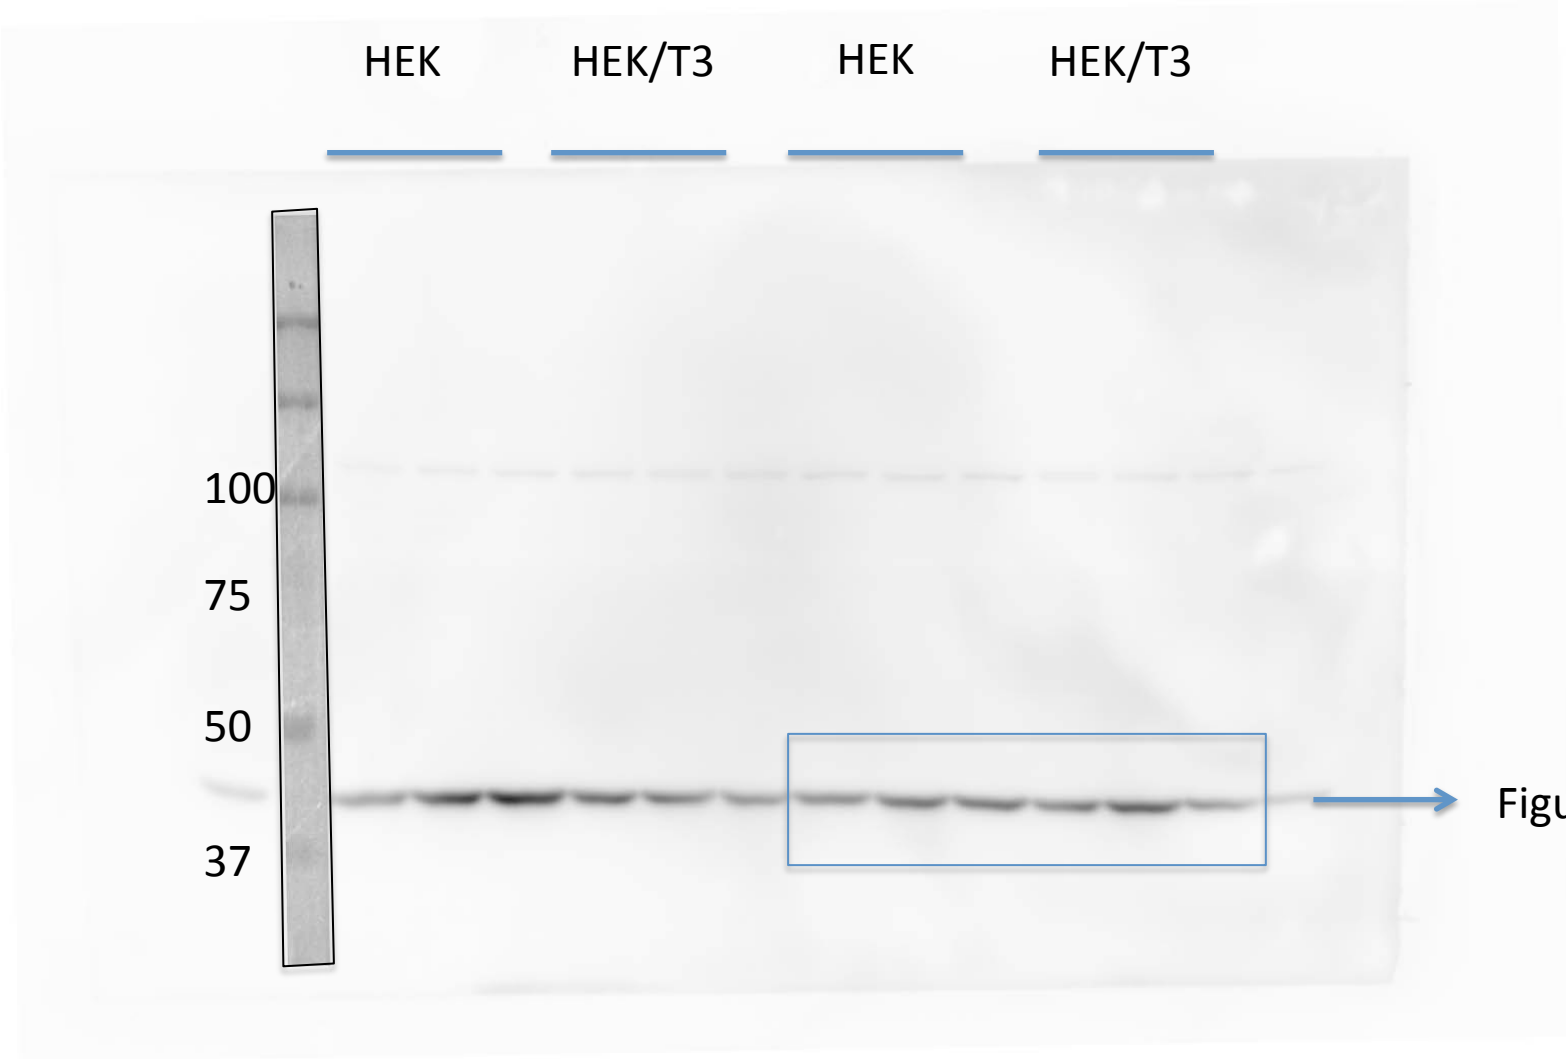

TIMP3

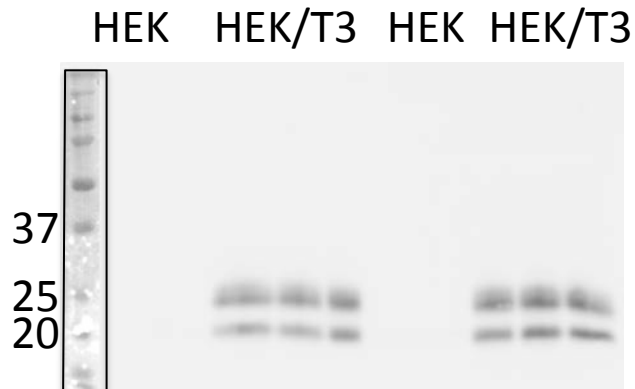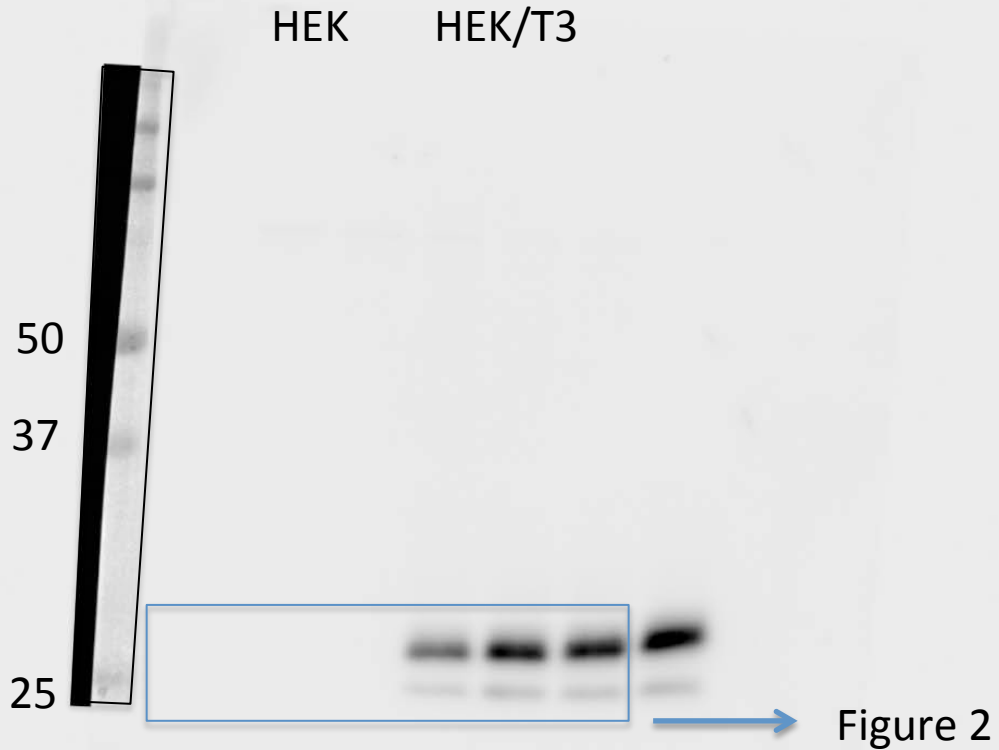



# MIF

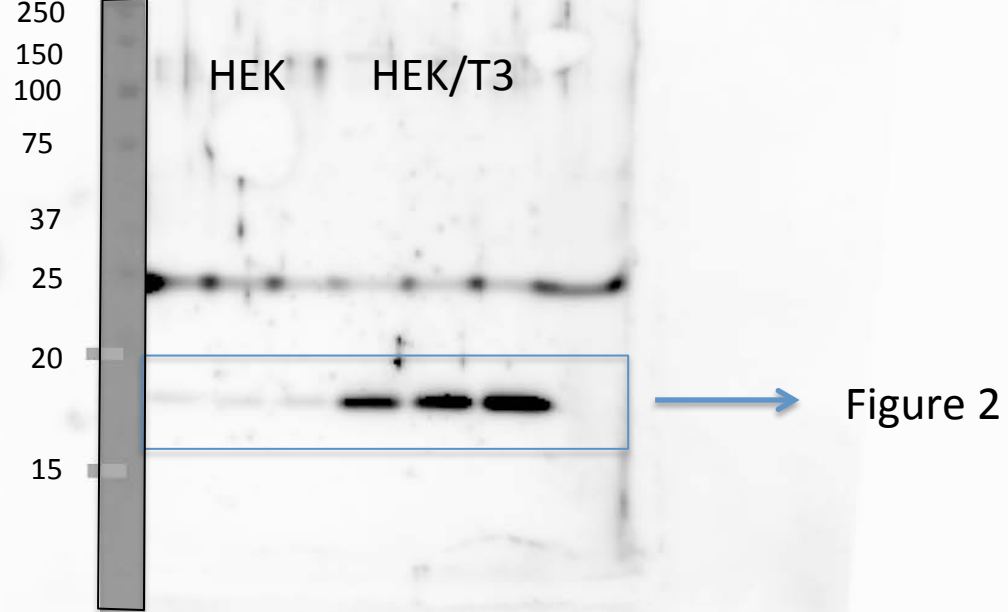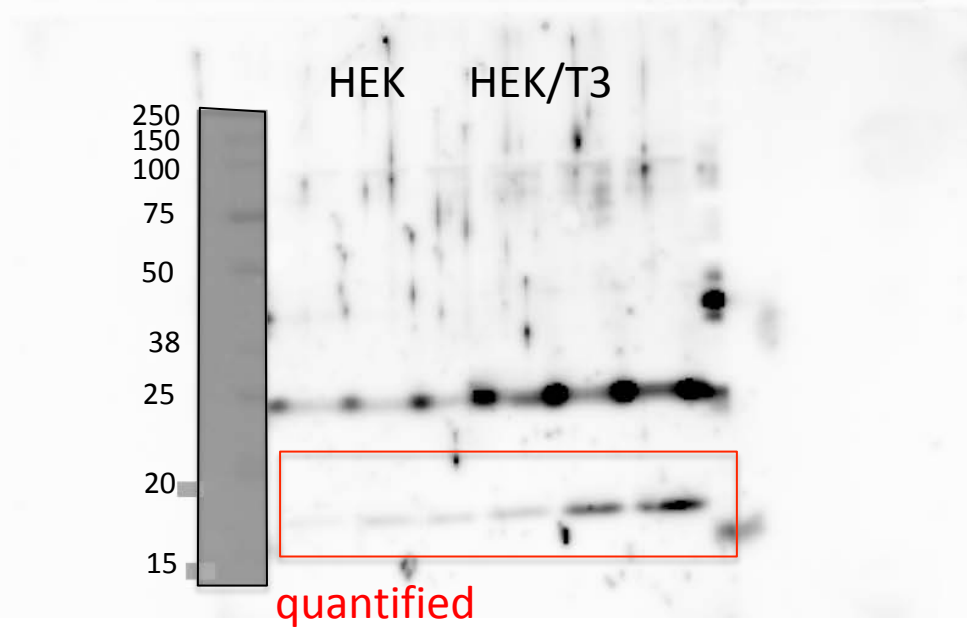

Blue square: bands in the MS. Red square + Blue square: bands quantified for statistics

# TIMP1

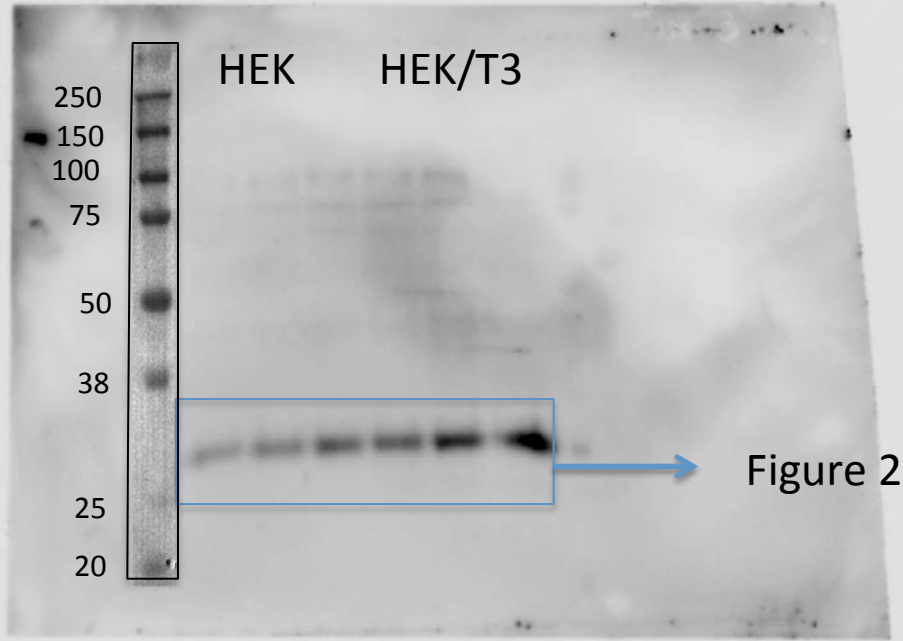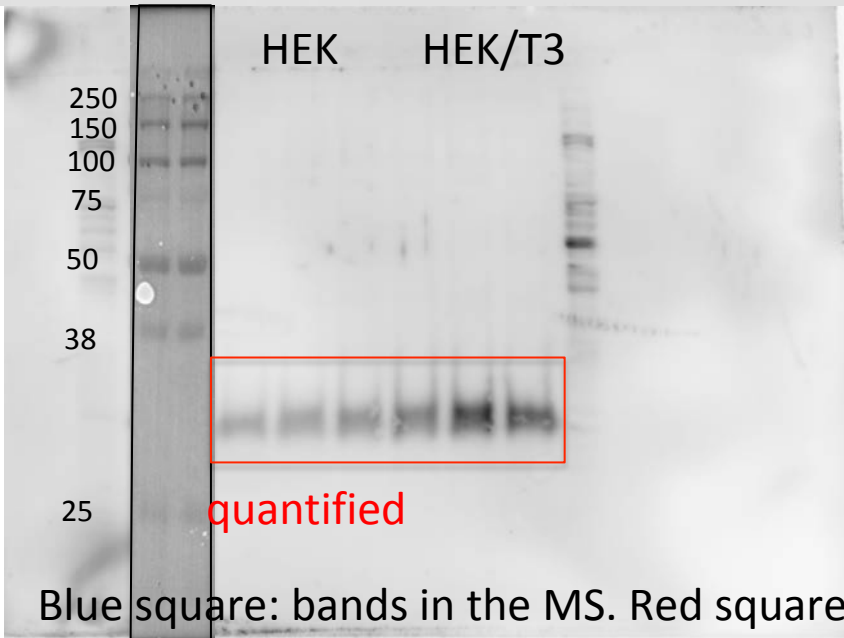

Blue square: bands in the MS. Red square + Blue square: bands quantified for statistics

# MMP1

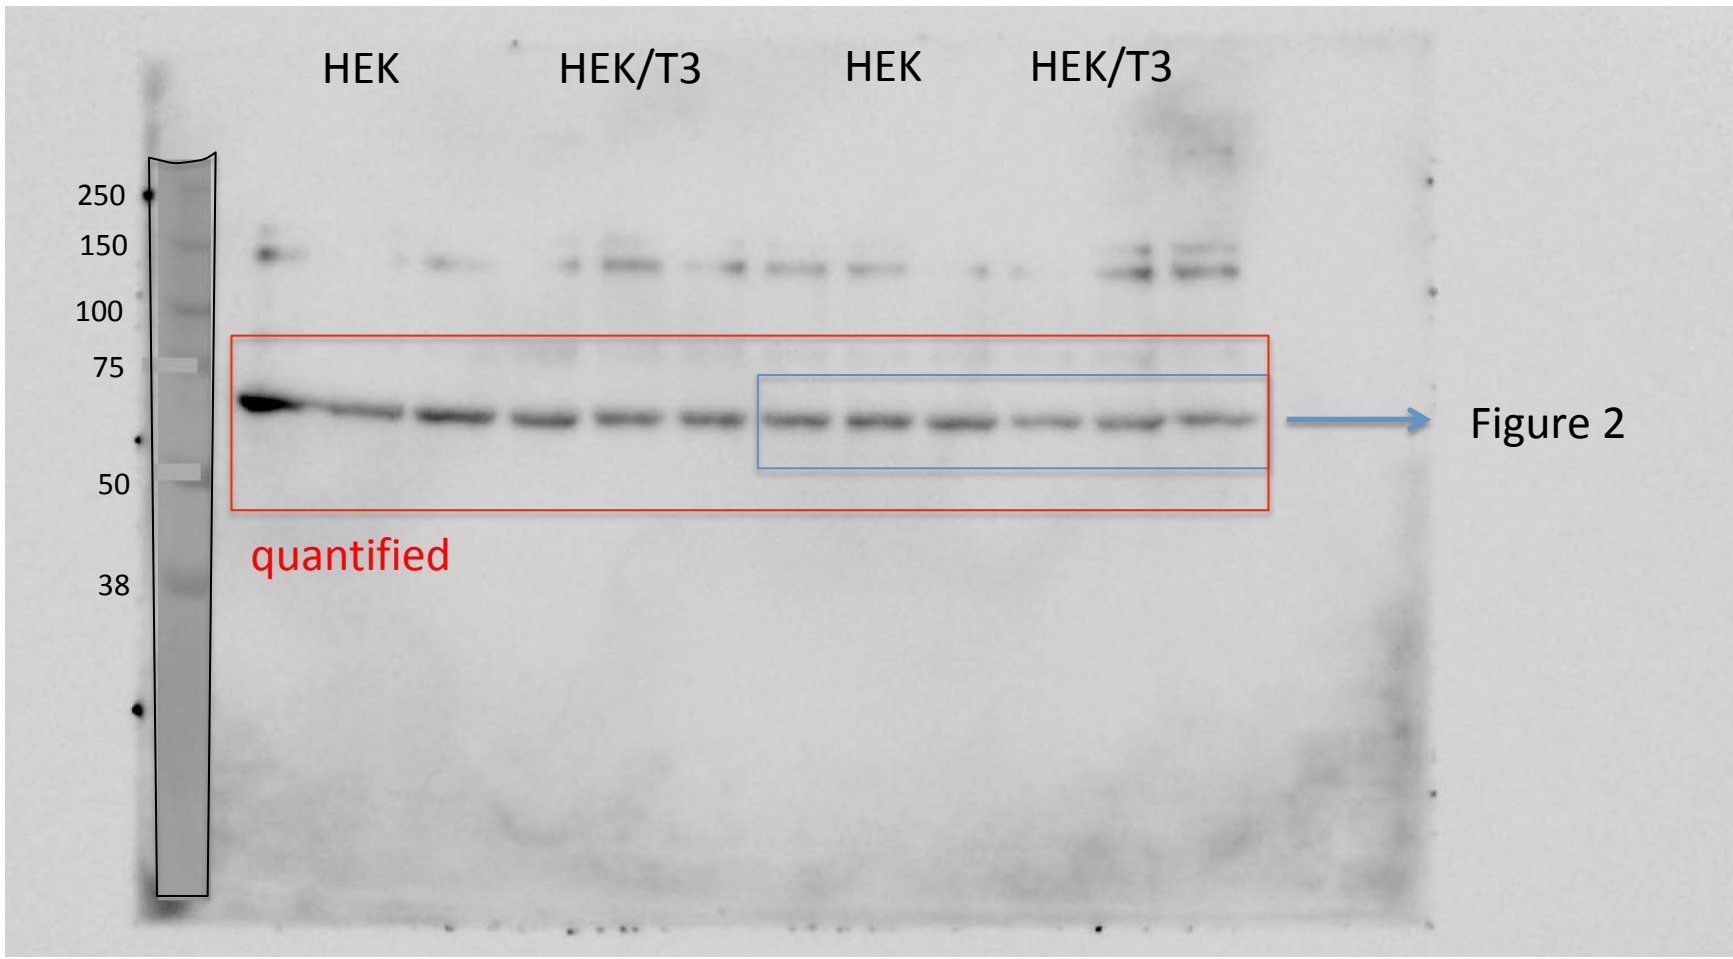

Blue square: bands in the MS. Red square: bands quantified for statistics

# SPARC

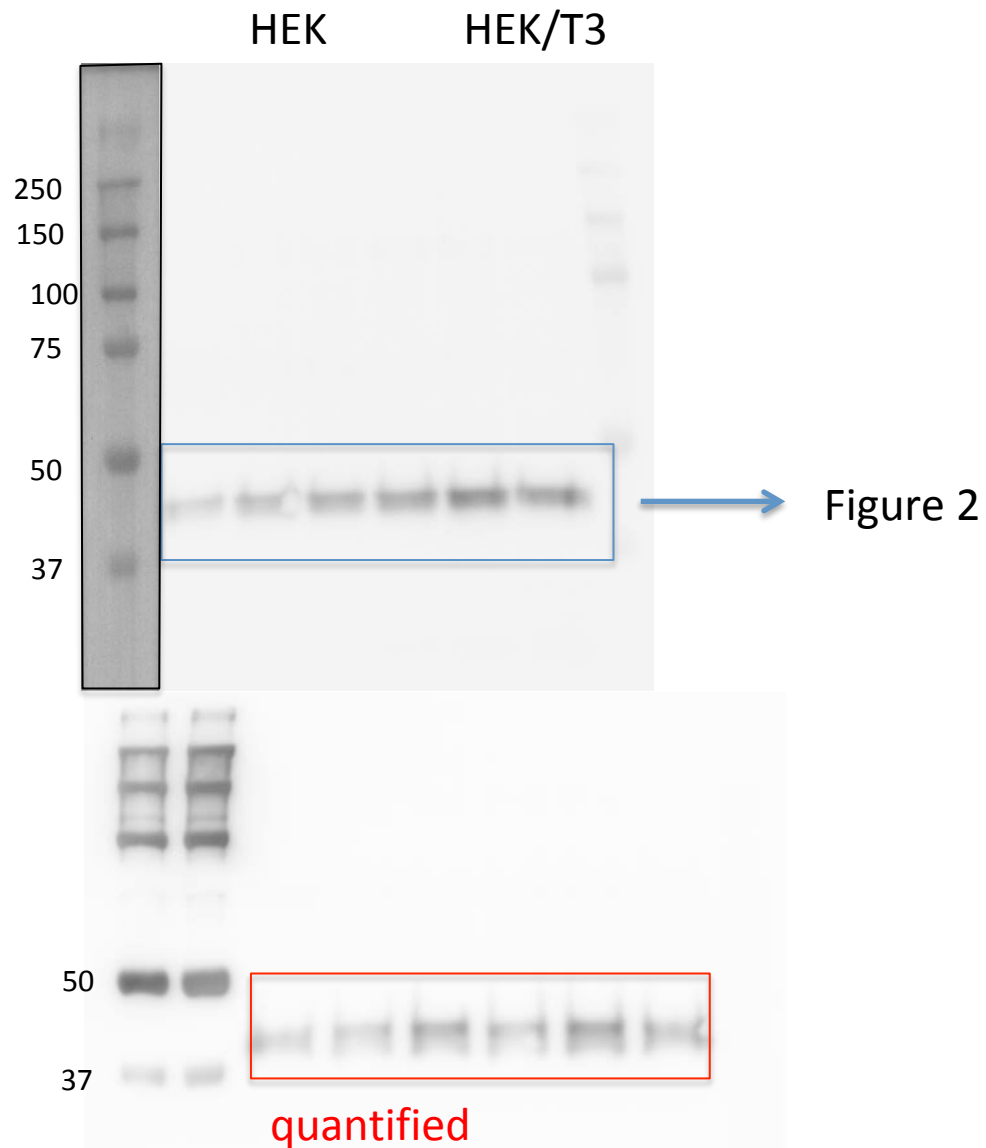

Blue square: bands in the MS. Red square + Blue square: bands quantified for statistics

# EphA4 FL

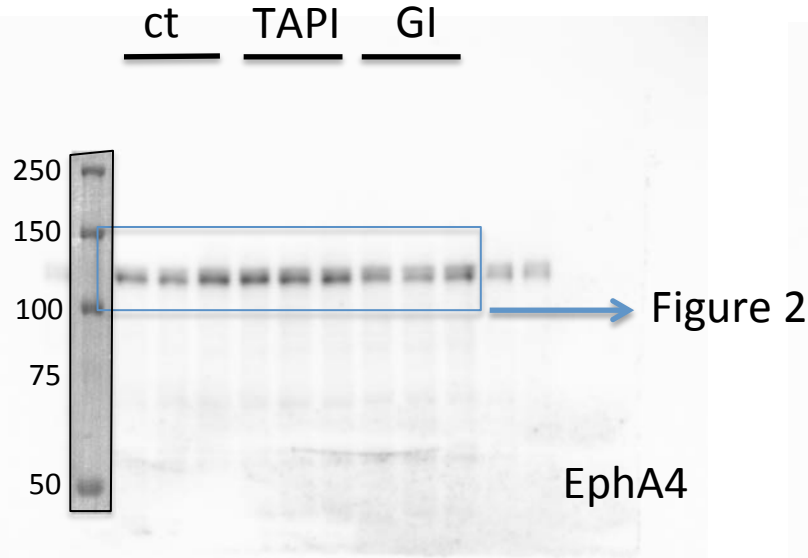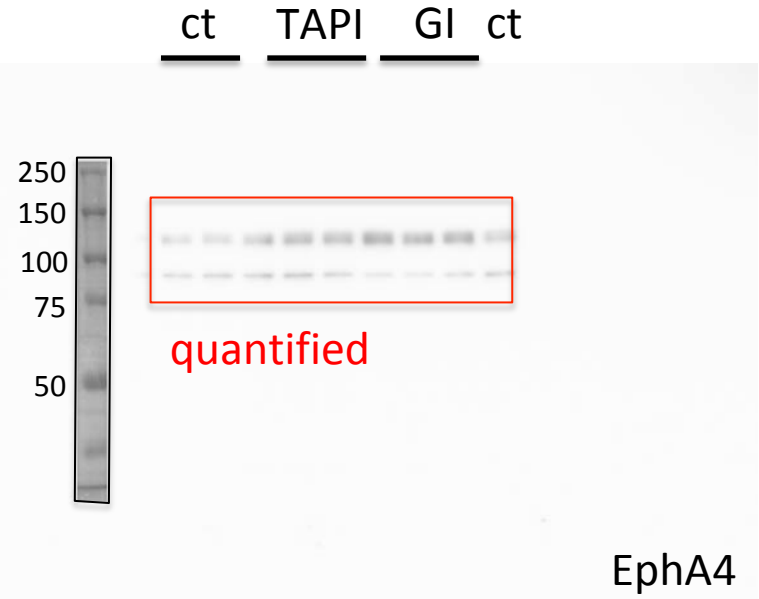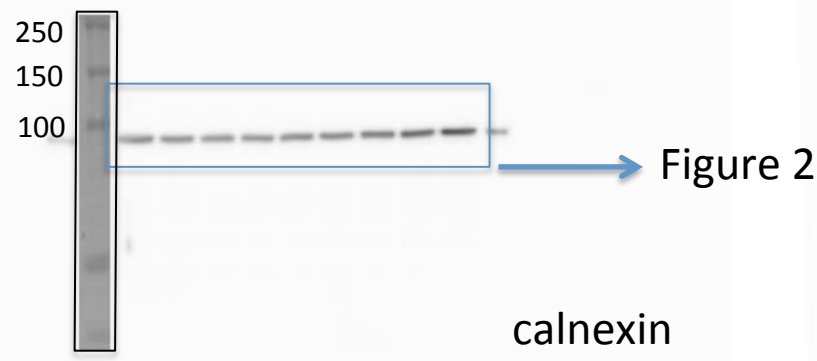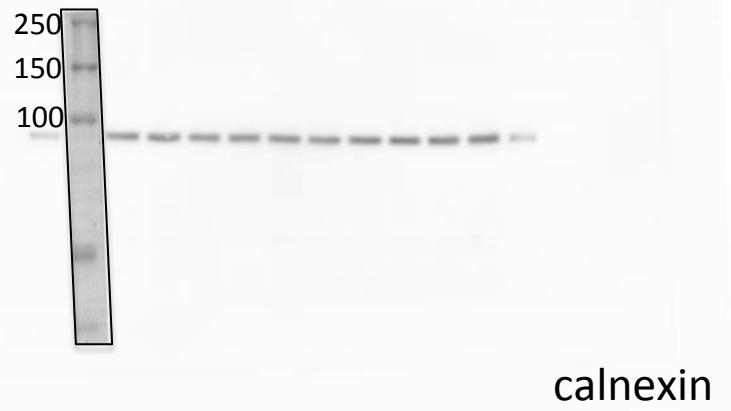

Blue square: bands in the MS. Red square + Blue square: bands quantified for statistics

# sEphA4

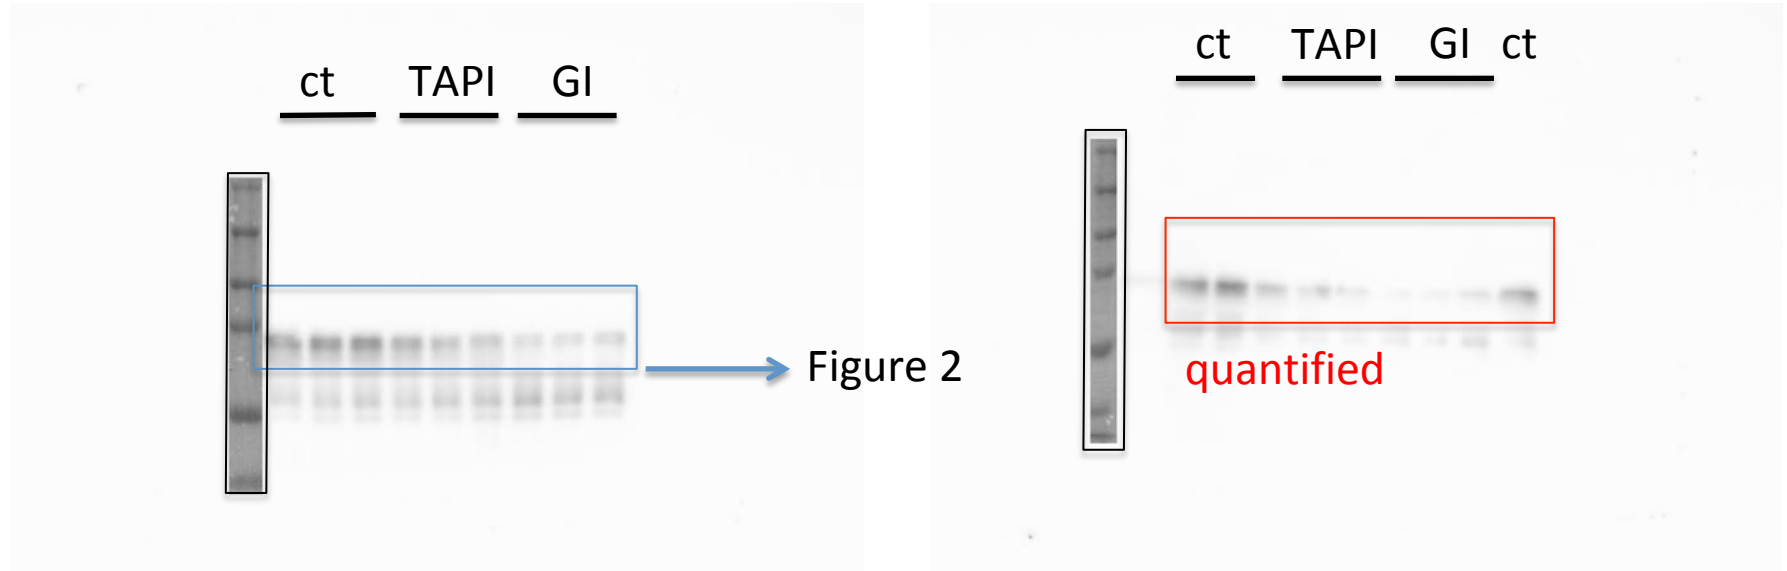

Blue square: bands in the MS. Red square + Blue square: bands quantified for statistics

# Figure 3

# TIMP3

ct

RAP

ct

RAP

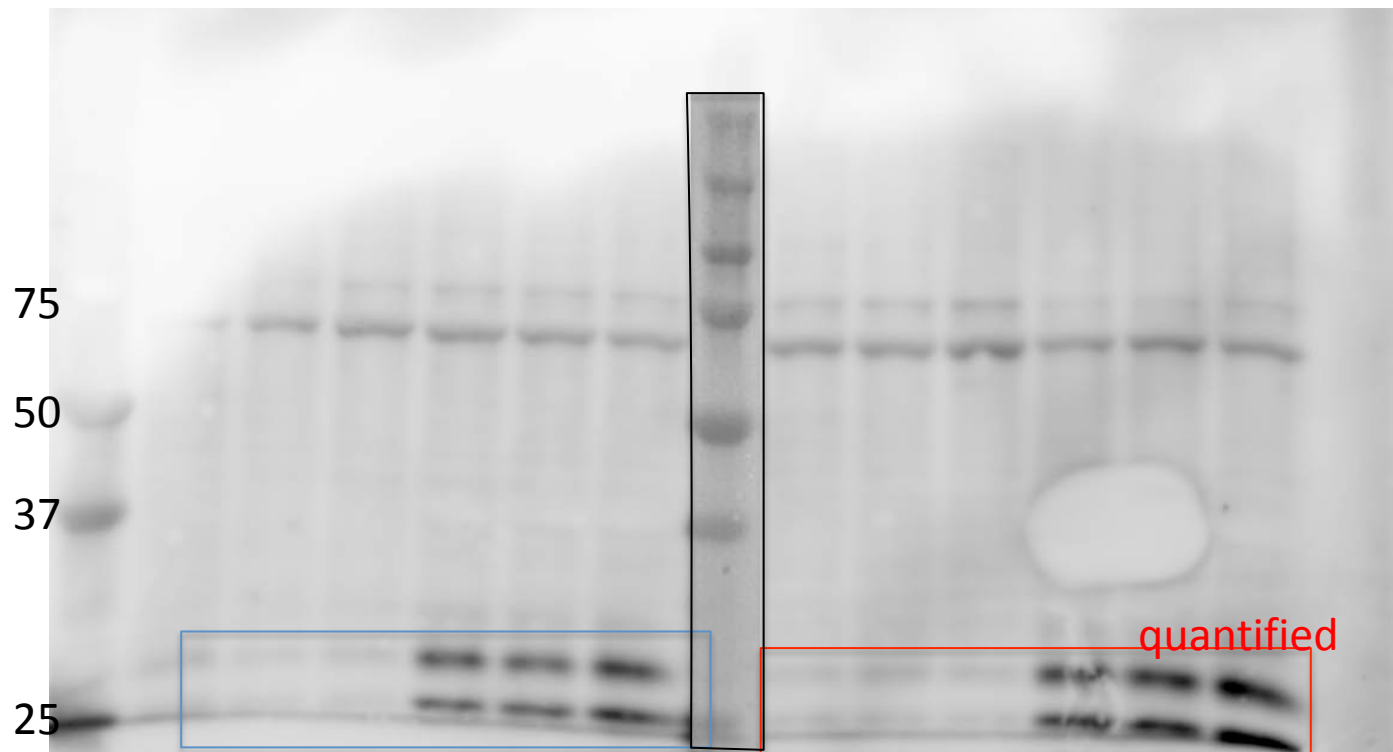

→ Figure 3

Blue square: bands in the MS. Red square + Blue square: bands quantified for statistics



TIMP1

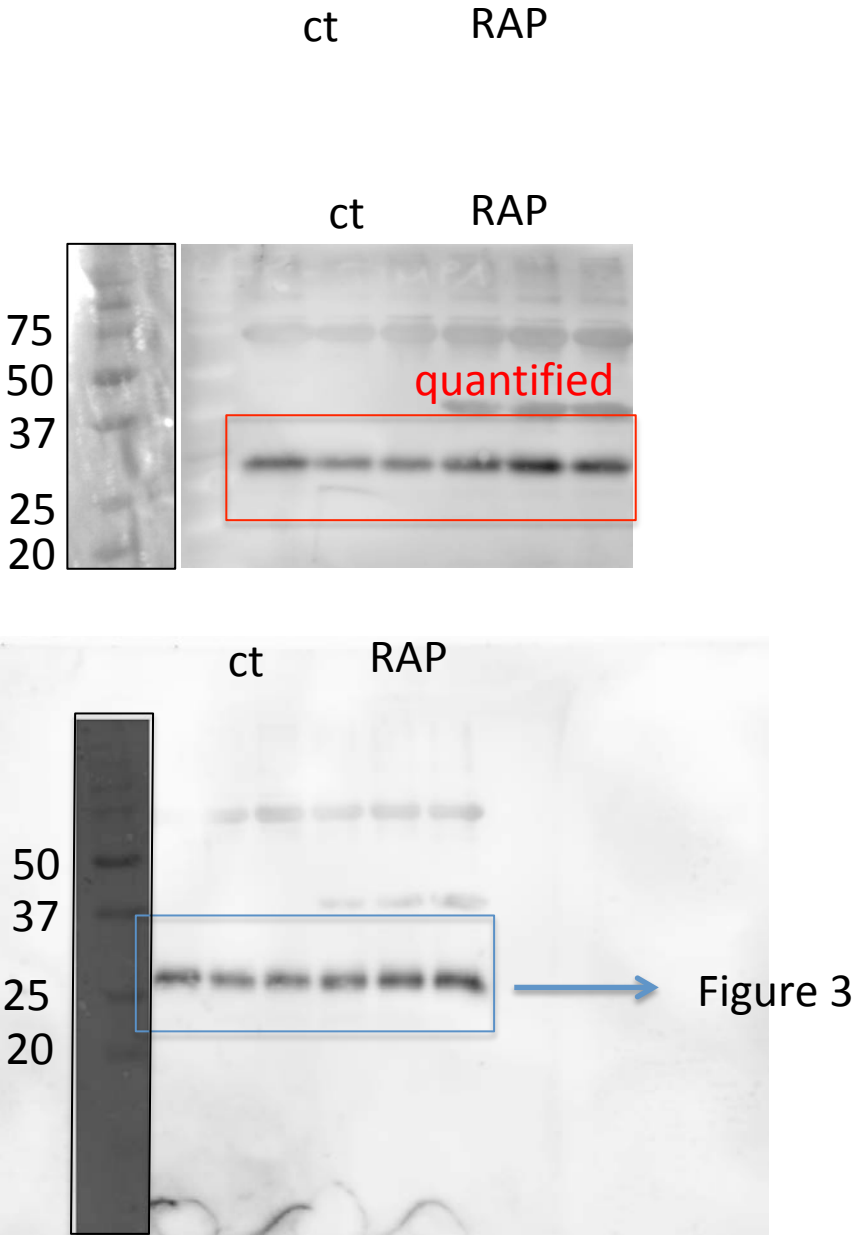

Blue square: bands in the MS. Red square + Blue square: bands quantified for statistics

# TIMP2

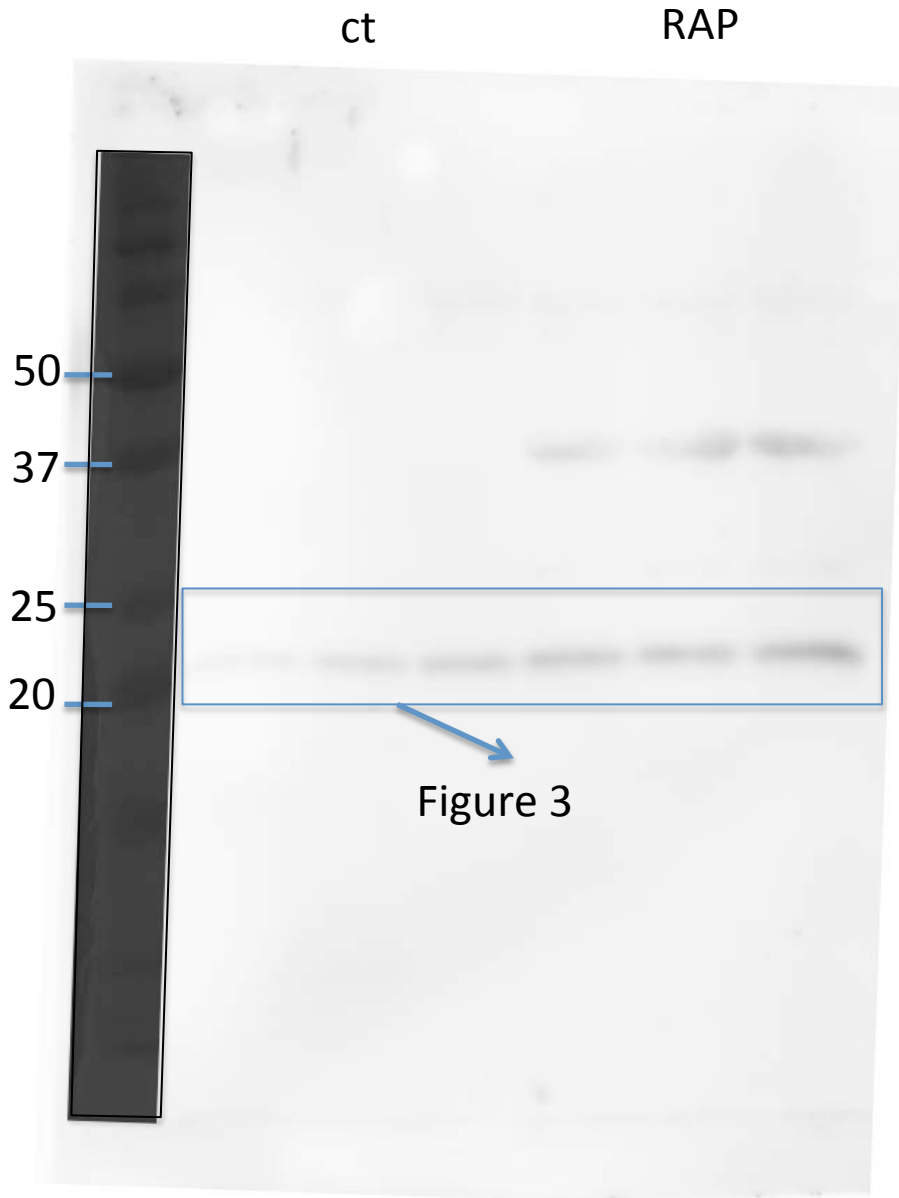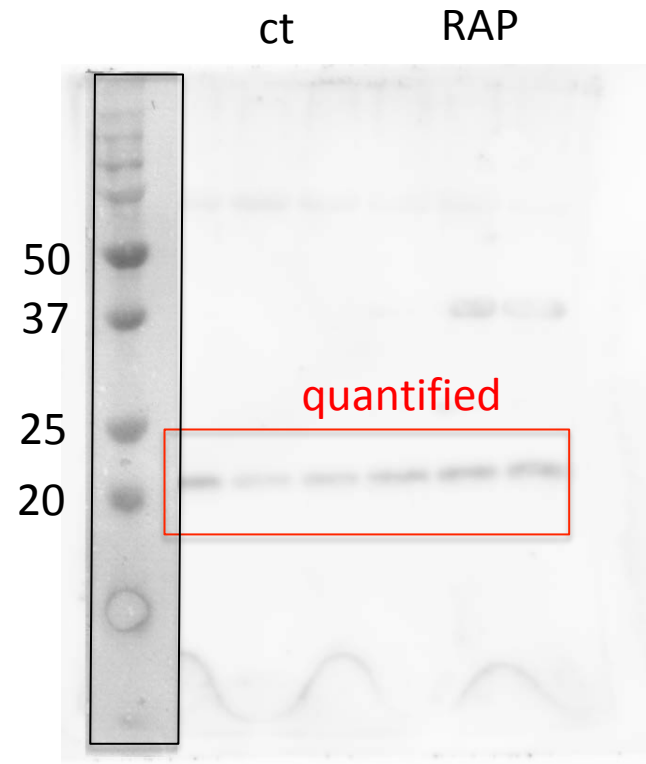

Blue square: bands in the MS. Red square + Blue square: bands quantified for statistics

# SPARC

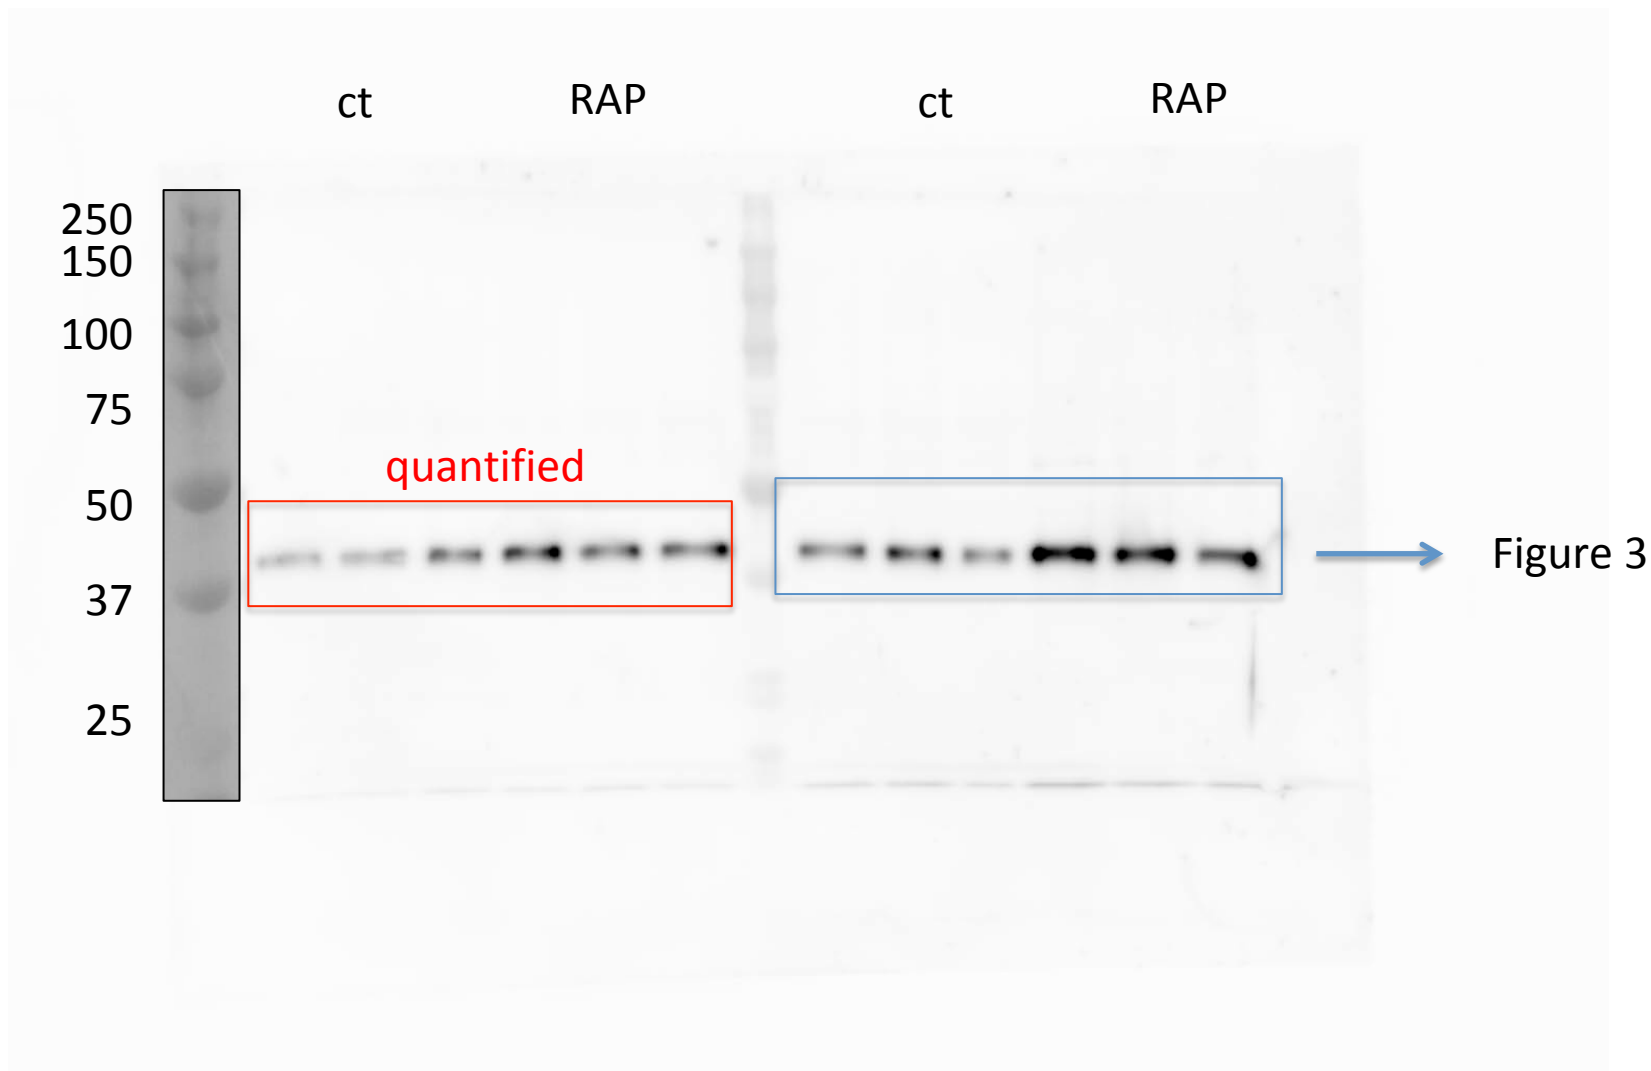

Blue square: bands in the MS. Red square + Blue square: bands quantified for statistics

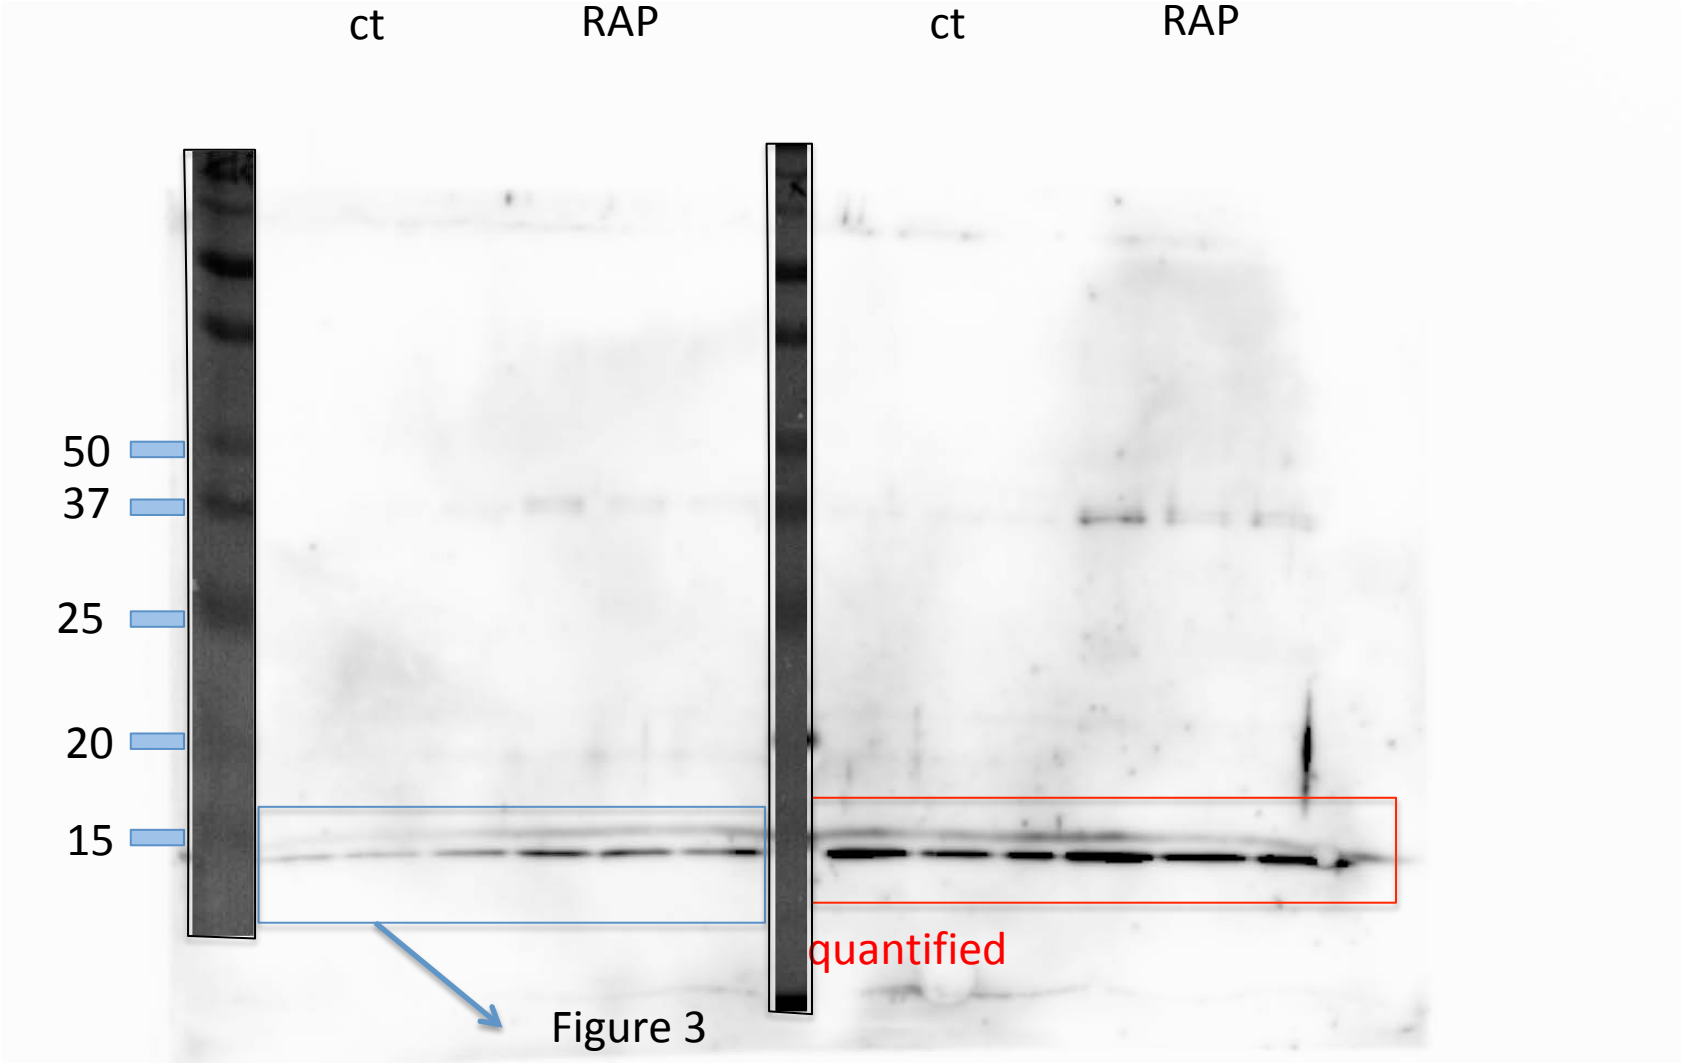

Blue square: bands in the MS. Red square + Blue square: bands quantified for statistics

# Figure 5

sAPP

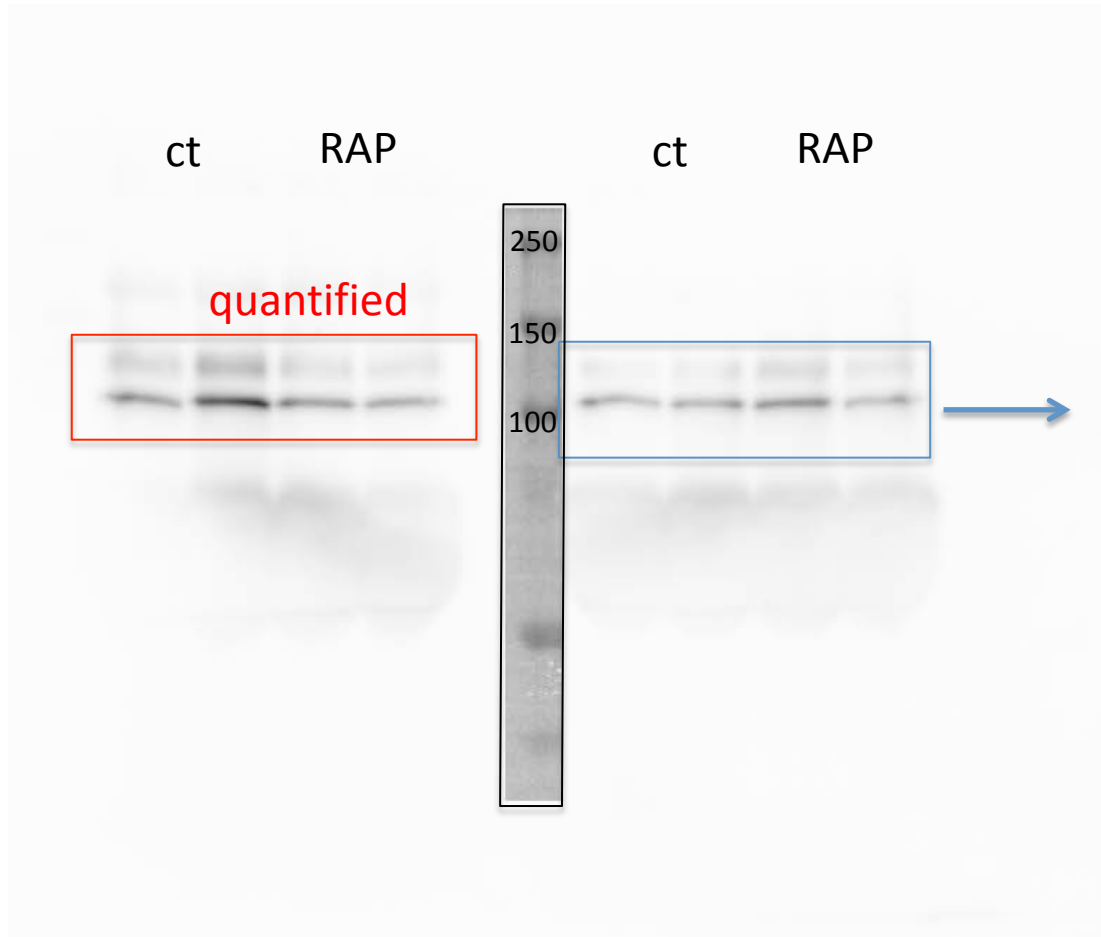

Figure 5

Blue square: bands in the MS. Red square + Blue square: bands quantified for statistics

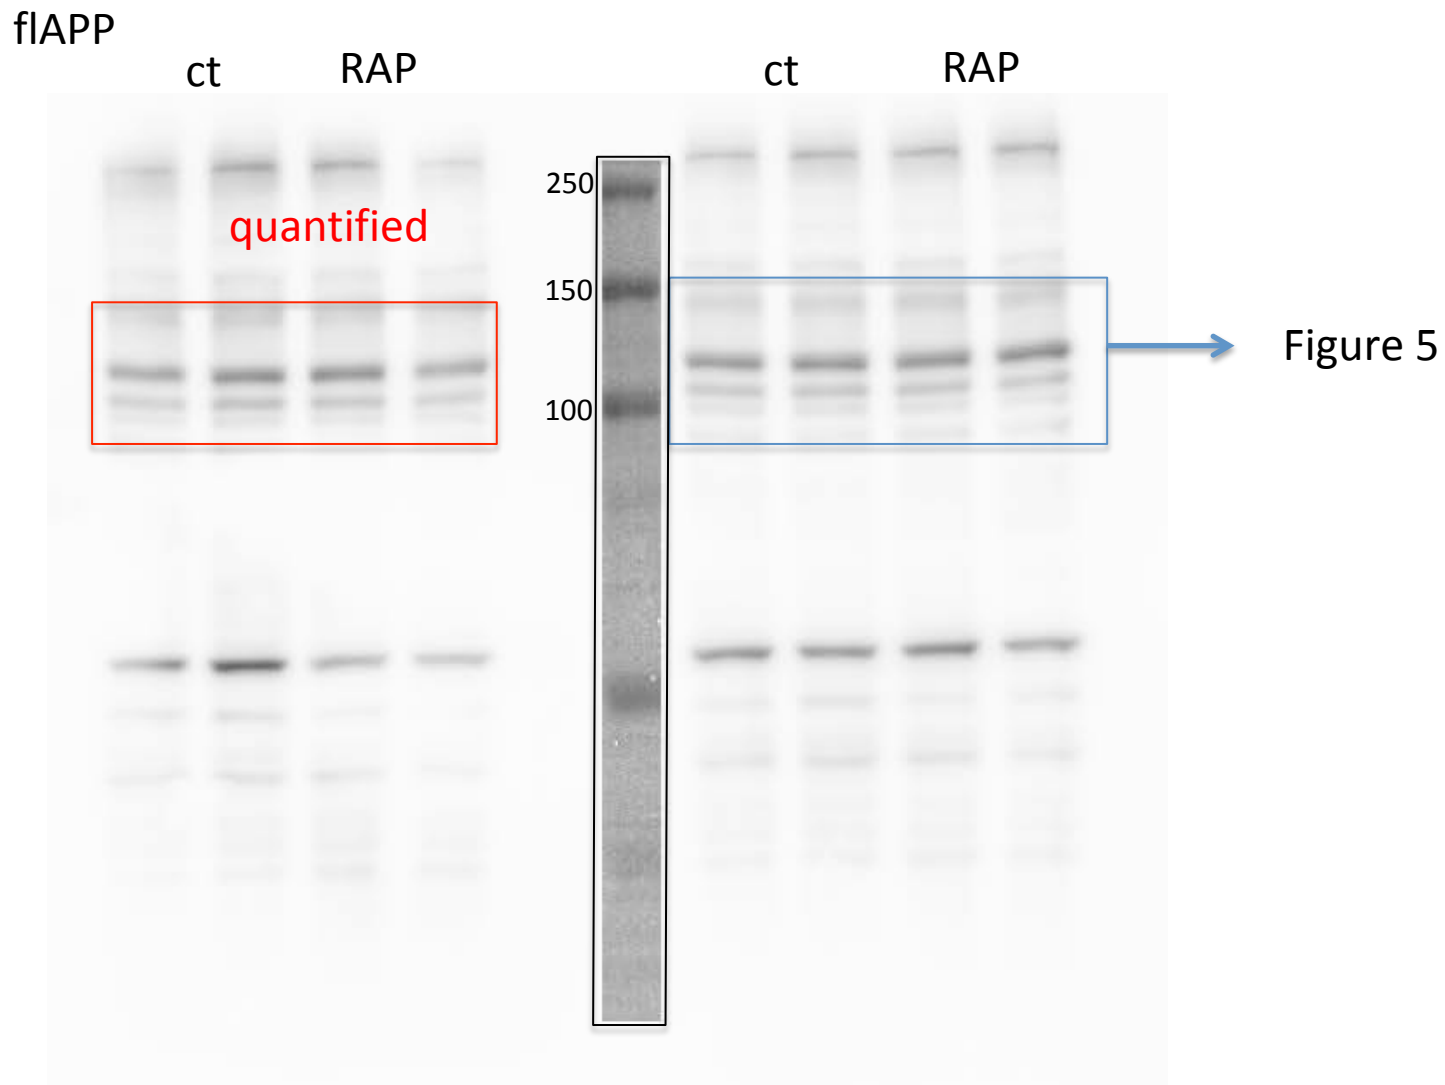

Blue square: bands in the MS. Red square + Blue square: bands quantified for statistics

actin

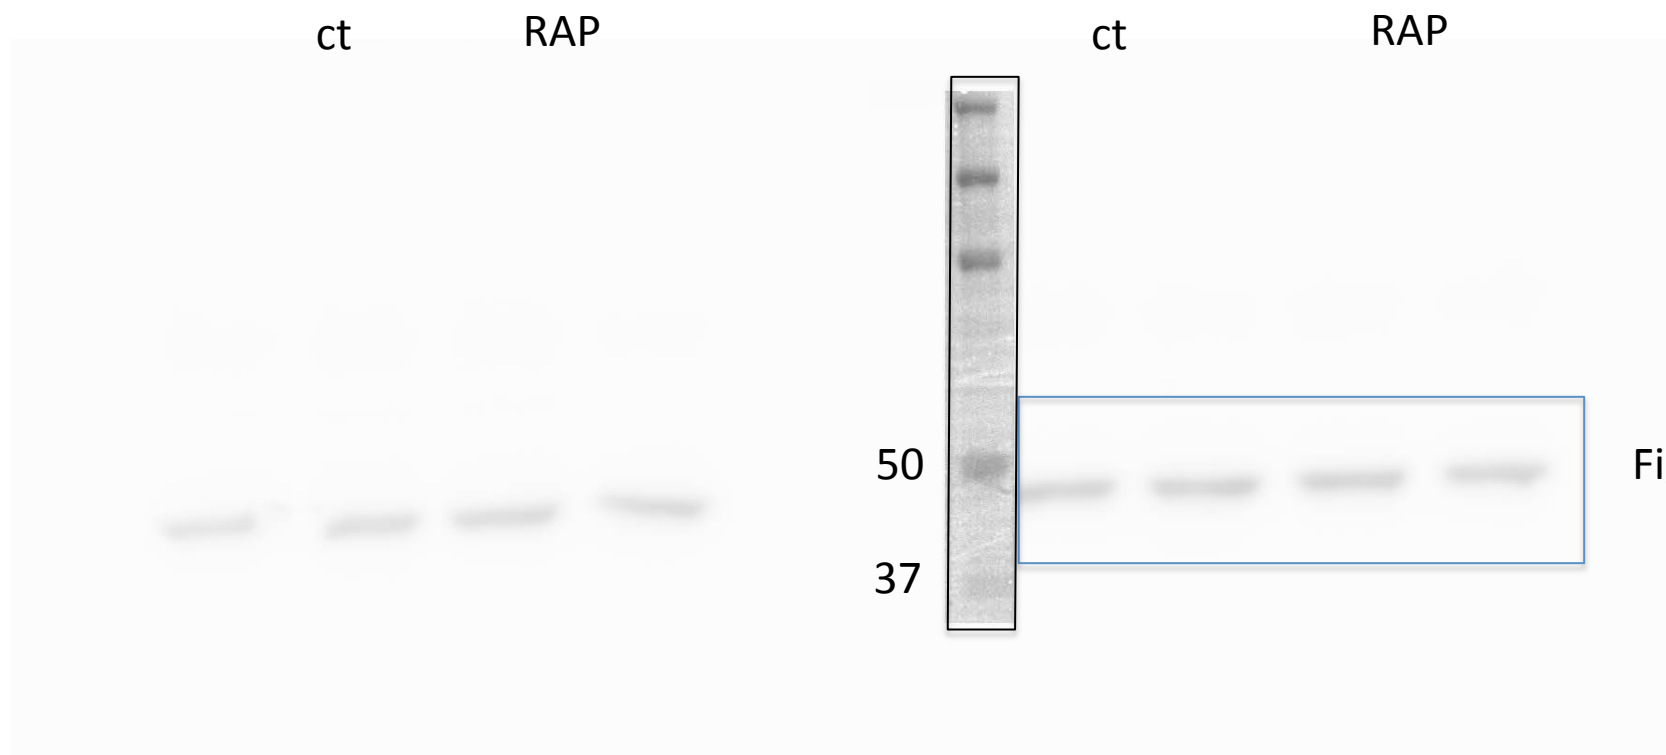

Figure 5



EphA4

CT RAP CT RAP

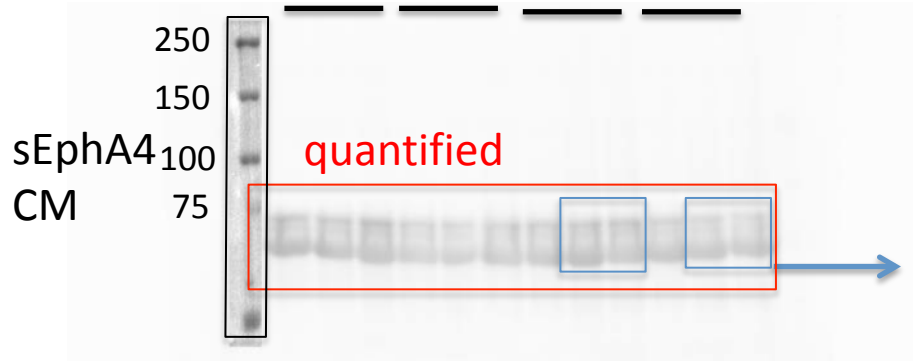

Figure 5

In the last version of the MS, the 2 bands that are not exactly next to each other, are clearly separated by a black line

flEphA4 lysates

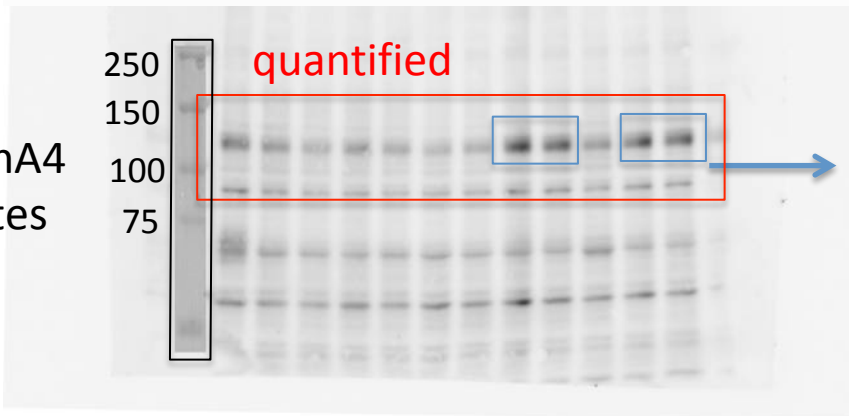

Figure 5

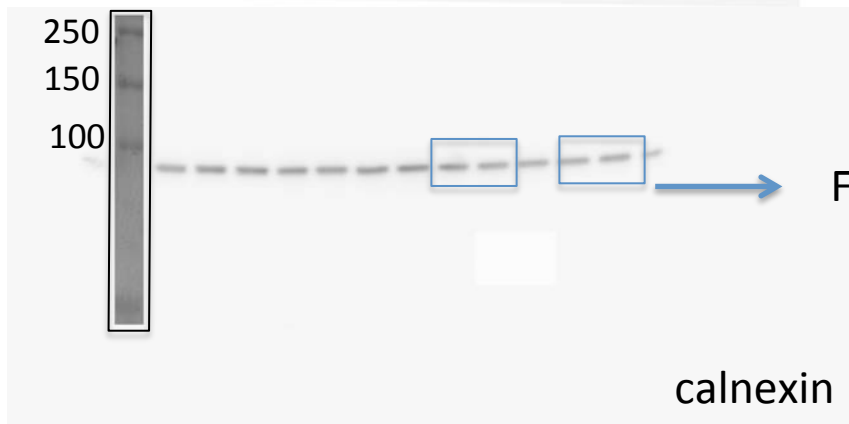

Figure 5

calnexin

Blue square: bands in the MS. Red square + Blue square: bands quantified for statistics
